# Supplementary material
Source: ML conference proceedings conference paper supplement (https://aclanthology.org/D18-1472)
Supplement: Attachment [file time-swish-comparing_submit-11-11.pdf › time-swish-comparing_submit-11-11.pdf]

## A Supplemental Material

Figures 4 and 5 graph the 21 activation functions investigated in this paper.

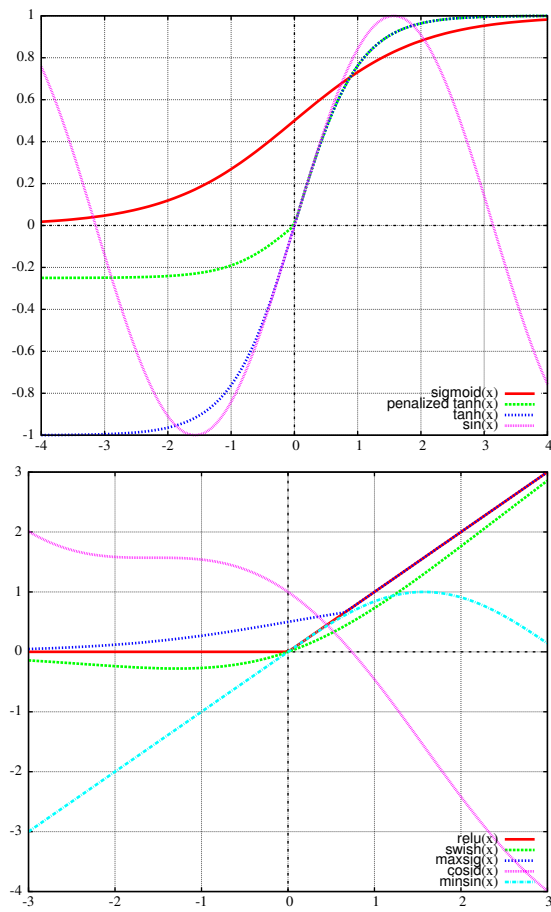

Figure 4: Several activation functions.

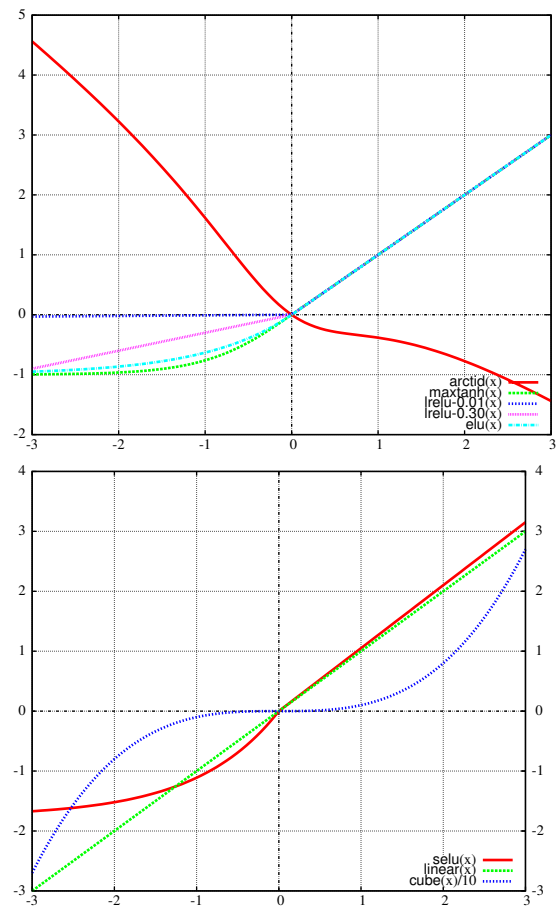

Figure 5: Several activation functions.
